# AUTOCORRELATED FLUCTUATIONS IN FECUNDITY AND SURVIVAL HAVE OPPOSING EFFECTS ON COEXISTENCE

SEBASTIAN J. SCHREIBER

**ABSTRACT.** Environmental fluctuations can mediate coexistence between competing species via the storage effect. This fluctuation-dependent coexistence mechanism requires three conditions: (i) a positive covariance between environment conditions and the strength of competition, (ii) species-specific environmental responses, and (iii) buffered population growth whereby species are less sensitive to competition in environmentally unfavorable years. In serially uncorrelated environments, the covariance condition (i) only occurs if favorable environmental conditions immediately and directly increase the strength of competition. However, for many demographic parameters such as maximal fecundity or adult survival, this direct link between favorable years and competition may not exist. Moreover, many environmental variables are temporal autocorrelated, but these correlations aren't accounted for in the theory. To address these limitations, a theory for coexistence of competing species in autocorrelated environments is developed. This theory shows the positive autocorrelations in demographic rates that increase fitness (e.g. maximal fecundity or adult survival) produce the positive environment-competition covariance. Hence, when these demographic rates contribute to buffered population growth (e.g. maximal fecundity), positive temporal autocorrelations generate a storage effect, otherwise (e.g. fluctuations in adult survival) they destabilize competitive interactions. For negatively autocorrelated environments, this theory highlights an alternative stabilizing mechanism that requires three conditions: (i') a negative environmental-competition covariance, (ii), and (iii') species are less sensitive to competition in more favorable years. When the conditions for these stabilizing mechanisms are violated, temporal autocorrelations can generate stochastic priority effects or hasten competitive exclusion. Collectively, these results highlight that temporal autocorrelations in environmental conditions can play a fundamental role in determining ecological outcomes of competing species.

## INTRODUCTION

Most species are engaged in competitive interactions with other species [Gurevitch et al., 1992, Kaplan and Denno, 2007]. This mutual antagonism can result in one species driving other species extinct. According to ecological theory, this competitive exclusion is inevitable when there are more species than limiting factors and the community approaches a steady state [Volterra, 1928, McGehee and Armstrong, 1977]. Hutchinson [1961] proposed that fluctuations in environmental conditions may allow species competing for few limiting factors to coexist. In a series of influential papers [Chesson and Warner, 1981, Chesson, 1983, 1988, 1994], Peter Chesson developed a mathematical theory for when and how environmental fluctuations, via nonlinear averaging and the storage effect, mediate species coexistence. In the past decade, empirical evidence for these coexistence mechanisms were identified in a diversity of systems including zooplankton [Cáceres, 1997], prairie grasses [Adler et al., 2006], desert annual plants [Angert et al., 2009], tropical trees [Usinowicz et al., 2012], phytoplankton [Ellner et al., 2016], sagebrush [Chu and Adler, 2015, Ellner et al., 2016], and nectar yeasts [Letten et al., 2018].

A key assumption of this theory and its extensions is that the environmental fluctuations are uncorrelated in time [Chesson, 1994, Schreiber et al., 2011]. Environmental fluctuations, however, are

---

DEPARTMENT OF EVOLUTION AND ECOLOGY, UNIVERSITY OF CALIFORNIA, DAVIS, ONE SHIELDS AVENUE, DAVIS, CA 95616, UNITED STATES

*E-mail address:* [sschreiber@ucdavis.edu](mailto:sschreiber@ucdavis.edu).

often autocorrelated [Steele, 1985]. Minimum and maximal monthly temperatures in both terrestrial and marine systems are typically positively autocorrelated [Vasseur and Yodzis, 2004]; months with higher temperature maxima tend to be followed by months with higher maxima. Approximately 20% of terrestrial sites on earth exhibit positively autocorrelated yearly rainfall, while 5% exhibit negatively autocorrelated rainfall [Sun et al., 2018]. Although considered less frequently, negative autocorrelations may be common in other situations [Metcalf and Koons, 2007]. For example, density-dependent driven oscillations of an herbivore or predator can result in negatively autocorrelated fluctuations in the mortality rates of its prey species.

Theoretical and empirical studies show that autocorrelated, environmental fluctuations can have large impacts on population demography [Foley, 1994, Petchey et al., 1997, Cuddington and Yodzis, 1999, Pike et al., 2004, Gonzalez and Holt, 2002, Cuddington and Hastings, 2016]. Theory predicts that positively autocorrelated fluctuations increase extinction risk when populations exhibit undercompensatory dynamics, but decreases extinction risk when populations exhibit overcompensatory dynamics [Petchey et al., 1997]. Consistent with the first theoretical prediction, clonal populations of *Folsomia candida* exhibited shorter times to extinction when fluctuating mortality rates were positively autocorrelated [Pike et al., 2004]. For structured populations, temporal autocorrelations can alter long-term population growth rates [Roy et al., 2005, Tuljapurkar and Haridas, 2006, Schreiber, 2010]. For example, lab experiments with paramecia and theory predicted that positively autocorrelated fluctuations in the local fitnesses of spatially structured populations can increase long-term population growth rates [Roy et al., 2005, Matthews and Gonzalez, 2007, Schreiber, 2010].

As autocorrelated fluctuations are common and have demographic impacts, they likely influence ecological outcomes of competing species. As recent mathematical theory [Benaïm and Schreiber, 2019] provides the analytical tools to explore this influence, I analyze models of two species competition accounting for autocorrelated fluctuations in environmental conditions. As these models correspond to competition for single, limiting factor and undercompensatory density-dependence, stable coexistence doesn't occur in constant environments. Therefore, using a mixture of analytical and numerical approaches applied to the stochastic models, I tackle the following questions: When do positively autocorrelated fluctuations in survival or reproduction mediate coexistence? When do they disrupt coexistence and, if they do, is the identity of the excluded species predictable? What types of shifts in competitive outcomes are possible as temporal autocorrelations shift from negative to positive?

## MODEL AND METHODS

Consider two competing species with densities  $n_1$  and  $n_2$ . The fitness of individuals within species  $i$ ,  $f(C, E_i)$ , decreases with the strength of competition  $C$  and increases with respect to an environmental response variable  $E_i$ . The strength of competition is given by a weighted combination of the species densities,  $C = a_1 n_1 + a_2 n_2$  where  $a_i$  determines the per-capita contribution of species  $i$  to the strength of competition. The environmental variable  $E_i$  represents the net effect of environmental conditions on species  $i$ 's fitness. Consistent with meteorological models of various weather variables [Wilks and Wilby, 1999, Semenov, 2008], fluctuations in the environmental response variables follow a multivariate autoregressive (MAR) process with means  $\bar{e}_i$ , standard deviations  $\sigma_i$ , cross-correlation  $\tau$ , and temporal autocorrelation  $\rho$ . Under these assumptions, the dynamics of the system are

$$(1) \quad \begin{aligned} n_i(t+1) &= n_i(t) f(a_1 n_1(t) + a_2 n_2(t), \bar{e}_i + \Delta e_i(t)) \text{ with } i = 1, 2 \\ \Delta e_i(t+1) &= \rho \Delta e_i(t) + \sqrt{1 - \rho^2} \xi_i(t+1) \end{aligned}$$

where  $\Delta e_i(t)$  are the deviations of the environmental variables away from the mean  $\bar{e}_i$ ,  $\xi_i(t)$  are independent in time with mean 0, standard deviation  $\sigma_i$ , and cross-correlation  $\text{Cor}[\xi_1(t)\xi_2(t)] = \tau$ . Provided

that  $|\rho| < 1$  (i.e. the environmental fluctuations are neither perfectly positively or negatively autocorrelated), the environmental deviations  $\Delta e_i(t)$  converge to a unique stationary distribution  $\widehat{\Delta e}_i$  with mean 0, variance  $\sigma_i^2$ , and cross-correlation  $\tau$ . The  $\sqrt{1 - \rho^2}$  term in (1) allows one to independently vary the variance of the stationary distribution and the temporal autocorrelation.

I study the dynamics of (1) using a mixture of analytical and numerical methods. The analysis assumes that the per-capita growth rates,  $\mathbb{E}[\log f(0, \bar{e}_i + \Delta e_i(t))]$ , of each species in the absence of competition are positive, and the fitness function  $f$  exhibits compensating density-dependence. These assumptions ensure there exists unique, positive stationary distributions  $(\hat{n}_i, \hat{E}_1, \hat{E}_2)$  for species  $i$  in the absence of competition with species  $j \neq i$  [Benaïm and Schreiber, 2009]. Here,  $\hat{E}_i = \bar{e}_i + \widehat{\Delta e}_i$ . Conditions for coexistence or exclusion depend on the realized per-capita growth rate of species  $j \neq i$  at these stationary distributions:

$$r_j = \mathbb{E}[\log f(a_i \hat{n}_i, \hat{E}_j)] \quad j \neq i.$$

If both realized per-capita growth rates are positive ( $r_1 > 0, r_2 > 0$ ), then the species coexist in the sense of stochastic persistence [cf. Theorem 1 in Benaïm and Schreiber, 2019] i.e. a statistical tendency to stay away from the extinction set (Fig. 1A). If  $r_1 < 0 < r_2$  (respectively,  $r_2 < 0 < r_1$ ), then species 2 excludes species 1 (respectively, species 1 excludes species 2) [cf. of Corollary 2 in Benaïm and Schreiber, 2019] (Fig. 1B). Finally, if both realized per-capita growth rates are negative, then the system exhibits a stochastic priority effect: with complementary positive probabilities either species goes extinct while the other species persists [cf. of Theorem 3 and Corollary 2 in Benaïm and Schreiber, 2019].

To derive mathematically rigorous approximations for the realized per-capita growth rates  $r_j$ , I use a diffusion-type scaling in which  $\bar{e}_1 - \bar{e}_2$ ,  $\sigma_1^2$ , and  $\sigma_2^2$  are small and of the same order [Turelli, 1977, Karlin and Taylor, 1981]. To illustrate the analytic results, I numerically compute the realized per-capita growth rates for the fitness function  $f(C, E_i) = \lambda/(1 + C) + s$  where the environmental response  $E_i$  either determine the maximal fecundity  $\lambda$  or determine the annual survivorship  $s$ . This functional form is used extensively in the theoretical and empirical literature [e.g., Adler et al., 2007, Godoy et al., 2014]. For the fecundity fluctuations, the maximal fecundity for species in year  $t$  equals  $\exp(\bar{e}_i + \Delta e_i(t))$ . For the survival fluctuations, the survival of species  $i$  in year  $t$  equals  $\exp(\bar{e}_i + \Delta e_i(t))/(1 + \bar{e}_i + \Delta e_i(t))$ . In both cases, the variables  $\xi_i(t)$  are drawn from multivariate normals with mean 0, variances  $\sigma_i^2$ , and cross-correlation  $\tau$ .

## RESULTS

I first present results for the deterministic model that show stable coexistence does not occur without environmental fluctuations. Next, I present results for environmental fluctuations where species only differ to the degree their environmental responses are correlated. In this special case, the deterministic dynamics are neutrally stable and environmental fluctuations either lead to coexistence or to a stochastic priority effect. Finally, I present results in which the species differ in their mean environmental response ( $\bar{e}_1 \neq \bar{e}_2$ ), the variation in their environmental responses ( $\sigma_1 \neq \sigma_2$ ), and the correlation in their environmental responses. The general case highlights when environmental stochasticity reverses competitive outcomes as well as stabilizes competitive interactions.

**Neutrality or exclusion in constant environments.** When the mean environmental responses are equal ( $\bar{e}_1 = \bar{e}_2$ ) and there are no environmental fluctuations ( $\sigma_1 = \sigma_2 = 0$ ), the species exhibit neutral coexistence (proof in Appendix). Specifically, there exists a line of equilibria connecting the

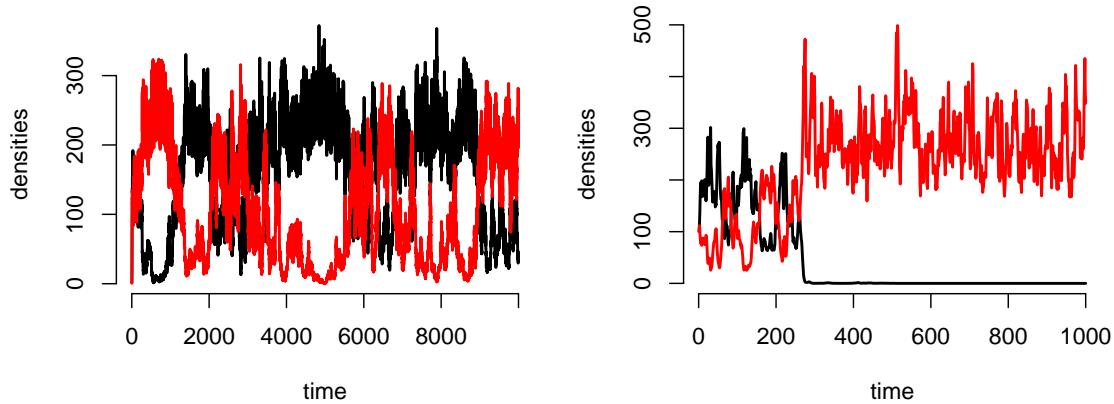

FIGURE 1. Stochastic coexistence (A) or exclusion (B) for models of competition in a fluctuating environment. Parameters: The fitness function is  $f(C, E_i) = \lambda/(1 + C) + \exp(E_i)/(1 + \exp(E_i))$  where  $C = a_1 n_1 + a_2 n_2$  is the strength of competition,  $\lambda$  is the maximal fecundity and  $E_i$  determines survivorship of competitor  $i$ .  $\lambda = 2$ ,  $a_1 = a_2 = 0.01$ , and  $\xi_i(t)$  are normally distributed with means  $\bar{e}_i = 0$ , standard deviations  $\sigma_i = 0.5$ , cross-correlation  $\tau = -1$ , and autocorrelations  $\rho = -0.5$  in (A) and  $0.5$  in (B).

single species equilibria. Community trajectories always converge to one of these equilibria, but different initial conditions can converge to different equilibria. This coexistence isn't stable in that small pulse perturbations typically shift the community to a different equilibrium state [Schreiber, 2006]. In contrast, if one species has a higher mean environmental response than the other ( $\bar{e}_1 \neq \bar{e}_2$ ), then this species competitively excludes the other species (proof in Appendix).

**From Neutrality to Coexistence or Alternative Stable States.** The simplest case in which environmental fluctuations alter ecological outcomes is when both species have the same mean environmental response ( $\bar{e}_1 = \bar{e}_2$ ) and experience the same degree of variation in their environmental response ( $\sigma_1 = \sigma_2$ ). Without environmental fluctuations, this leads to neutral coexistence in which  $r_j = 0$  for both species. With environmental fluctuations, our diffusion approximation yields (derivation in Appendix)

$$(2) \quad r_j \approx \frac{\partial^2 \log f}{\partial C \partial E} \times \text{Cov}[\hat{n}_i, \hat{E}_j - \hat{E}_i]$$

where the mixed partial derivative,  $\frac{\partial^2 \log f}{\partial C \partial E}$ , is evaluated at  $E = \bar{e}_i$  and the equilibrium value  $C = n_i^*$  where  $f(a_i n_i^*, \bar{e}_i) = 1$ . The sign of this mixed partial derivative determines whether the log fitness function is superadditive (positive sign) or subadditive (negative sign) with respect to the interactive effects of competition and environmental fluctuations [see e.g. Puterman, 2014]. Subadditivity means that the log fitness function,  $\log f$ , is less sensitive to the effects of competition when environmental conditions are poor. This corresponds to population buffering, a necessary component of the storage effect [Chesson, 1994, Ellner et al., 2016]. Superadditivity, in contrast, means that the log fitness function is more sensitive to the effects of competition when environmental conditions are poor, but also that is less sensitive to the effects of competition when environmental conditions are good. For example, when there are environmental fluctuations in the maximal fecundity (e.g.  $f(C, E_i) = \exp(E_i)/(1 + C) + s$ ), the log-fitness function is subadditive and population buffering occurs. In contrast when there are environmental fluctuations in survival ( $f(C, E_i) = \lambda/(1 + C) + \exp(E_i)/(1 + \exp(E_i))$ ), the log fitness function is superadditive and populations are less sensitive to competition in years with high survival.

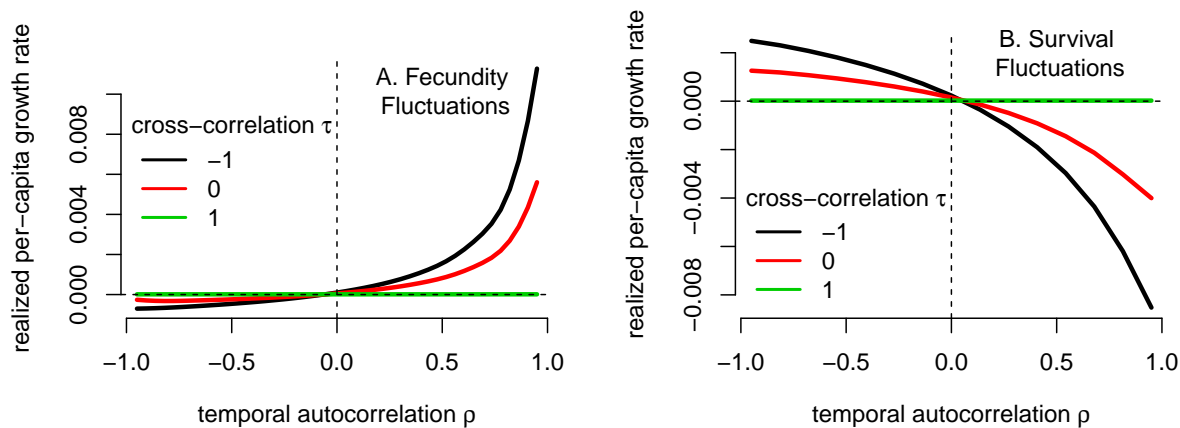

FIGURE 2. Positively autocorrelated fluctuations in fecundity (A) and negative autocorrelated fluctuations in survival (B) mediate coexistence. Numerically computed realized per-capita growth rates  $r_j$  as a function of the temporal autocorrelation  $\rho$  for competing species with fitness functions  $f(C, E) = \lambda/(1 + C) + s$  where the environmental variable  $E$  either determines the maximal reproductive rate  $\lambda$  (A) or survivorship  $s$  (B). Different curves corresponds to different levels of cross-correlation  $\tau$  where competitors only differ demographically if  $\tau < 1$ . For positive realized per-capita growth rates, the competitors coexist (stochastic persistence). For negative realized per-capita growth rates, each competitor is excluded with positive complementary positive probabilities (stochastic bistability). Parameters:  $a_1 = a_2 = 1$  and  $(\xi_1(t), \xi_2(t))$  normally distributed with standard deviation 0.3 for both panels. For A,  $s = 0.9$ ,  $\lambda_i(t) = \exp(\bar{e} + \Delta e_i(t))$ , and  $\bar{e} = \ln 2$ . For B,  $s_i(t) = \exp(\bar{e} + \Delta e_i(t))/(1 + \exp(\bar{e} + \Delta e_i(t)))$ ,  $\bar{e} = 0$ , and  $\lambda = 2$ .

The final term in equation (2) corresponds to the covariance between the density of the common species ( $n_i$ ) and the difference ( $E_j - E_i$ ) between the environmental responses of the rare and common species. This term is positive when years with high and low densities, respectively, of the common species also correspond to years where the rare species has a higher and lower environmental response, respectively. This covariance is proportional to a product of three terms (derivation in Appendix):

$$(3) \quad \text{Cov}[\hat{C}_i, \hat{E}_j - \hat{E}_i] \propto \rho \times (\tau - 1) \times \sigma^2$$

Whenever the species are not identically responding to the fluctuations ( $\tau < 1$ ), equation (3) implies that the sign of this covariance is opposite of the sign of the autocorrelation. Hence, in positively autocorrelated environments, years with greater densities of the common species tend to be years where the environmental conditions are less favorable to the rare species.

Collectively, equations (2) and (3) imply environmental fluctuations promote coexistence (i.e.  $r_j > 0$ ) in two situations: (i) the log-fitness is superadditive and environmental fluctuations are negatively autocorrelated, and (ii) the log-fitness is subadditive and environmental fluctuations are positively autocorrelated i.e. the storage effect. In contrast, if (iii) the log-fitness function is superadditive and environmental functions are positive autocorrelated or (iv) the log-fitness function is subadditive and the fluctuations are negatively autocorrelated, then the system is stochastically bistable: with complementary, positive probabilities species 1 or 2 is excluded.

Figure 2 illustrates these analytical conclusions for the fitness function  $f(C, E_i) = \lambda/(1 + C) + s$  where  $E$  determines the maximal fecundity ( $\lambda$ ) or survival ( $s$ ). As the log fitness  $\log f$  is subadditive with respect to fecundity, positively autocorrelated fluctuations in fecundity mediate coexistence, while



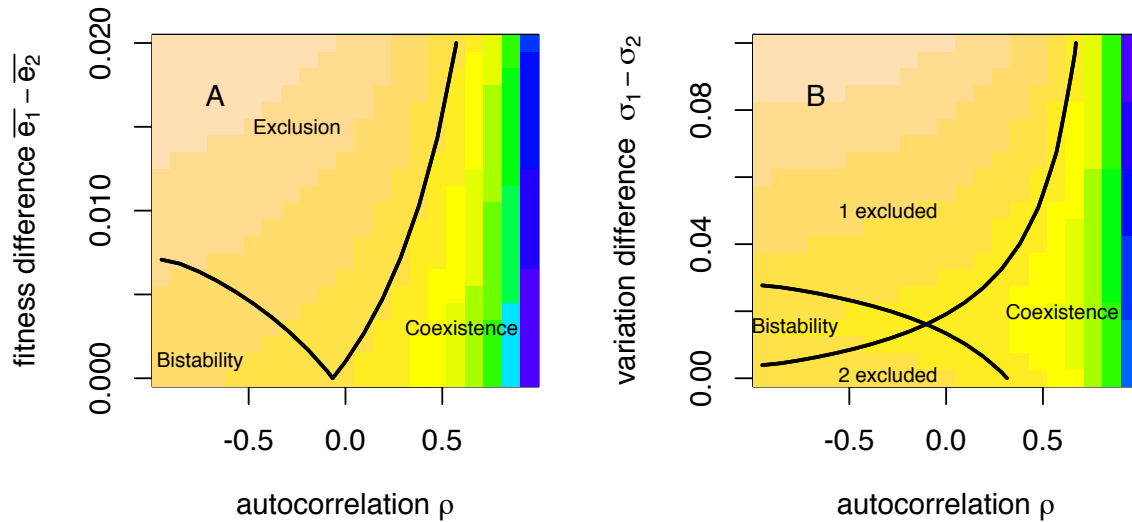

FIGURE 3. Interactive effects of fitness differences and autocorrelation on ecological outcomes. In A, species 1 has a positive mean fitness advantage ( $\bar{e}_1 - \bar{e}_2 > 0$ ) over species 2. In B, species 1 has a small mean fitness advantage over species 2 but experiences greater environmental variation ( $\sigma_2 - \sigma_1 \geq 0$ ) than species 2. Regions of coexistence, competitive exclusion, and bistability are shown. Solid contour lines correspond to  $r_1 = 0$  and  $r_2 = 0$ . Coloring is determined by the minimum of the realized per-capita growth rates,  $\min\{r_1, r_2\}$ , with tan for most negative values to blue for the most positive values. Parameters: fitness functions given by  $\exp(\bar{e}_i + \Delta e_i(t)) / (1 + n_1 + n_2) + 0.9$  where  $\bar{e}_2 = \ln 2$  in A and B,  $\bar{e}_1 = \ln 2.01$  in B,  $\bar{e}_1$  as determined by the fitness difference  $\bar{e}_1 - \bar{e}_2$  in A,  $\xi_i(t)$  are normally distributed with  $\tau = -1$ ,  $\sigma_1 = \sigma_2 = 0.3$  in A, and  $\sigma_2 = 0.3$  and  $\sigma_1$  as shown in B.

negative autocorrelations lead to stochastic bistability (Fig. 2A). In contrast, as the log fitness  $\log f$  is superadditive with respect to survival, positively autocorrelated fluctuations in survival lead to stochastic bistability, while negative autocorrelations promote coexistence (Fig. 2B).

**The Effects of Fitness Differences and Nonlinear Averaging.** Asymmetries in the mean response ( $\bar{e}_1 \neq \bar{e}_2$ ) and the variability of these responses ( $\sigma_1 \neq \sigma_2$ ) lead to two additional terms in the realized per-capita growth rate (derivation in Appendix):

$$(4) \quad r_j \approx \frac{\partial \log f}{\partial E}(\bar{e}_j - \bar{e}_i) + \frac{1}{2} \frac{\partial^2 \log f}{\partial E^2}(\sigma_j^2 - \sigma_i^2) + \frac{\partial^2 \log f}{\partial C \partial E} \times \text{Cov}[\hat{C}_i, \hat{E}_j - \hat{E}_i]$$

As the log fitness increases ( $\log f$ ) with the environmental response variable ( $E$ ), the first term in (4) is proportional to the difference,  $\bar{e}_j - \bar{e}_i$ , in the mean environmental response between the rare and common species. Intuitively, when the rare species benefits more, on average, from the environmental conditions ( $\bar{e}_j > \bar{e}_i$ ), the realized per-capita growth rate of the rare species is larger. The sign of the second term in equation (4) depends on the concavity of log fitness with respect to the environmental response variable. When the log fitness function is concave (as one might normally expect), the second term contributes positively to the realized per-capita growth if the rare species exhibits less variation in its environmental response ( $\sigma_i^2 < \sigma_j^2$ ). This second term corresponds to the effect of nonlinear averaging [Chesson, 1994]. Namely, there is a reduction (respectively, increase) in the realized per-capita growth rate due to the concavity (respectively, convexity) of the log fitness function.

Differences in the variation of the environmental responses also impact the covariance between the density of common species and difference in the environmental responses i.e. the third term of (4). Specifically, a refinement of expression (3) shows that (derivation in Appendix)

$$(5) \quad \text{Cov}[\hat{C}_i, \hat{E}_j - \hat{E}_i] \propto \rho\sigma_i(\tau\sigma_j - \sigma_i).$$

Hence, the sign of this covariance no longer only depends on the sign of the autocorrelation coefficient. Specifically, when the common species experiences greater fluctuations in their environmental responses and these fluctuations are sufficiently positively correlated with the rare species' environmental responses (i.e.  $\tau\sigma_j > \sigma_i$ ), the covariance (5) is negative and, thereby, may impede coexistence for species experiencing buffered population growth.

To illustrate these analytical results, Fig. 3 numerically computed the realized per-capita growth rates  $r_j$  with fluctuations in fecundity i.e.  $f(C, E) = \exp(E)/(1 + C) + s$ . In Fig. 3A, the species only exhibit differences in their mean environmental response and have negatively correlated environmental responses. With small differences in the mean environmental response, sufficiently negative autocorrelations result in bistability, intermediate autocorrelations result in the species with larger mean environmental response excluding the other species, and sufficiently positive autocorrelations mediate coexistence. When the difference in mean environmental response is large, sufficiently positive autocorrelations mediate coexistence, otherwise the species with the lower mean environmental response is excluded. In Fig. 3B, one species has a higher mean environmental response ( $\bar{e}_1 > \bar{e}_2$ ), but also experiences greater variability in its environmental response ( $\sigma_1 > \sigma_2$ ). When the difference in variation is sufficiently low, species 1 excludes species 2 unless temporal autocorrelation is sufficiently high. In contrast, when the difference in variation is sufficiently high, species 2 excludes species 1 unless temporal autocorrelation is sufficiently high. This reversal in fates stems from the reduction of  $r_2$  due to the concavity of the log fitness function and the higher variation of species 2's environmental response i.e. nonlinear averaging.

## DISCUSSION

Hutchinson [1961] wrote “the diversity of the plankton was explicable primarily by a permanent failure to achieve equilibrium as the relevant external factors changes.” It wasn't until thirty years later that Peter Chesson developed a theoretical framework for precisely identifying fluctuation-dependent mechanisms for coexistence [see, e.g., Chesson and Warner, 1981, Chesson, 1983, 1988, 1994] including the storage effect. The storage effect stabilizes coexistence, when (i) there is a positive correlation between the environmental response of each species and the competition experienced by that species, (ii) there are species-specific environmental responses, and (iii) buffered population growth in which species are less sensitive to competition in years of poor environmental conditions. In serially uncorrelated environments which is an underlying assumption of the theory [Chesson, 1994], the first condition requires that there is a direct and immediate impact of the environmental response on the strength of competition. This occurs, for example, in annual populations with year to year variation in germination rates: when more seeds germinate, more plants compete for limiting resources. This direct and immediate impact, however, does not occur when maximal yield or adult survival varies, as in the models considered here. However, when the temporal fluctuations in these demographic rates are autocorrelated, the analysis presented here reveals that the environmental-competition covariance can still occur in these fundamental demographic parameters. Furthermore, these autocorrelated fluctuations highlight how another, under-appreciated stabilizing mechanisms arises when conditions (i) and (iii) simultaneously do not hold.

Hutchinson [1961] hinted at temporal autocorrelations as a stabilizing mechanism when he wrote: “equilibrium would never be expected in nature whenever complete competitive replacement of one species by another occurred in a time ( $t_c$ ), of the same order, as the time ( $t_e$ ) taken for a significant seasonal change in the environment.” As competitive exclusion typically takes several generations, Hutchinson’s quote implies that coexistence requires the shifts in environmental conditions favoring differing species should take several generations. Thus, the environmental conditions must be positively autocorrelated over several generations. Consistent with this suggestion, I show that when there is population buffering (i.e. log fitness is subadditive) and there are species-specific environmental responses, positively autocorrelated fluctuations in environmental conditions yield a storage effect. Namely, condition (ii) is satisfied as better years for one species tend to be preceded by better years for this species and, therefore, tends to lead to higher densities (greater competition) in the focal year. This finding is consistent with two prior studies [Jiang and Morin, 2007, Schreiber et al., 2019]. Jiang and Morin [2007] manipulated temporal fluctuations experienced by two species of ciliated protists competing for bacterial resources. These temperature fluctuations had large effects on the intrinsic growth rates of the two species, consistent with the fluctuating fecundity model considered here. When the temperature fluctuations were temporally uncorrelated, their experimental results suggested that resource partitioning and temperature-dependent competitive effects lead to coexistence, not a storage effect. In contrast, when temperature fluctuations were positively autocorrelated, their experimental results suggested that resource partitioning and the storage effect lead to coexistence. Alternatively, using a symmetric version of the fluctuating fecundity model considered here, Schreiber et al. [2019] demonstrated numerically that the realized per-capita growth rates  $r_j$  increase with positive autocorrelations. However, they did not analyze this numerical trend.

Autocorrelated fluctuations also can lead to an alternative stabilizing mechanism when (i’) there is a negative covariance between environment and competition, (ii) there are species-specific environmental responses, and (iii’) species are less sensitive to competition in years of good environmental conditions. Condition (iii’) arises when adult survival fluctuates. Condition (i’) occurs when fluctuations in survival are negatively auto-correlated as populations densities are higher in years following higher survival, but survival in the following year tend to be lower. Negatively autocorrelated environments can arise in a variety of ways [Metcalf and Koons, 2007]. For example, approximately 5% of sites analyzed by [Sun et al., 2018] exhibit negatively autocorrelated rainfall. Interestingly, Adler and Levine [2007] found that species richness in central North American grasslands increased most in wet years that followed dry years. Alternatively, models and empirical studies show that overcompensatory or delayed density-dependent feedbacks can generate negatively autocorrelated fluctuations in densities [May, 1976, Tilman and Wedin, 1991, Crone and Taylor, 1996, Gilg et al., 2003]. If these fluctuations in densities occur in an herbivore, pathogen, or predator, then they can generate negatively autocorrelated fluctuations in survival of competing plants, hosts, or prey. Finally, competing species that exhibit multiple generations per year may experience negative autocorrelations in seasonal environments [Metcalf and Koons, 2007].

Autocorrelated fluctuations in survival or fecundity can generate alternative stable states and drive complex shifts in ecological outcomes. Alternative stable states arise as a stochastic priority effect: either species has a non-zero probability of being excluded, but the species at initially lower frequencies are more likely to be excluded. For small differences in mean fitness, stochastic induced alternative states arise whenever buffered populations experience a negative environment-competition covariance or whenever unbuffered populations experience a positive environment-competition covariance. Chesson [1988] highlights this possibility for annual plants with fluctuating seed survival, but his observation appears to be under-appreciated in the priority effects literature [Fukami, 2015, Fukami et al., 2016]. Shifts in temporal autocorrelations also generate complex shifts in ecological outcomes when one species



has an inherent competitive advantage over the other, such as a higher mean environmental response or less variability in their environmental response. Under these circumstances, shifts from negative to positive temporal autocorrelations can result in shifts from a stochastic priority effect to competitive exclusion to coexistence (Fig. 3).

In conclusion, temporally autocorrelated environmental fluctuations indirectly generate a covariance between environmental conditions and the strength of competition. When this covariance is positive and there is population buffering this leads to a storage effect [Chesson, 1988, 1994]. As positive autocorrelations are seen in many climatic variables, accounting for these autocorrelations in data-driven models [Chu and Adler, 2015, Ellner et al., 2016, 2018] likely will lead to more empirically based examples of the storage effect. In contrast, when there is a negative environment-competition covariance, an alternative stabilizing mechanism to the storage effect arises provided species are less sensitive to competition in years where environmental conditions are favorable. As there are simple, ecologically plausible conditions that generate this alternative stabilizing mechanism, it will be exciting to see whether or not empirically based demonstrations will be found.

## REFERENCES

- P.B. Adler and J.M. Levine. Contrasting relationships between precipitation and species richness in space and time. *Oikos*, 116:221–232, 2007.
- P.B. Adler, J. HilleRisLambers, P.C. Kyriakidis, Q. Guan, and J.M. Levine. Climate variability has a stabilizing effect on the coexistence of prairie grasses. *Proceedings of the National Academy of Sciences*, 103:12793–12798, 2006.
- Peter B. Adler, Janneke HilleRisLambers, and Jonathan M. Levine. A niche for neutrality. *Ecology Letters*, 10:95–104, 2007.
- A.L. Angert, T.E. Huxman, P. Chesson, and D.L. Venable. Functional tradeoffs determine species coexistence via the storage effect. *Proceedings of the National Academy of Sciences*, 106(28):11641–11645, 2009.
- M. Benaïm and S.J. Schreiber. Persistence of structured populations in random environments. *Theoretical Population Biology*, 76:19–34, 2009.
- M. Benaïm and S.J. Schreiber. Persistence and extinction for stochastic ecological models with internal and external variables. *Journal of Mathematical Biology*, 2019.
- C.E. Cáceres. Temporal variation, dormancy, and coexistence: a field test of the storage effect. *Proceedings of the National Academy of Sciences*, 94(17):9171–9175, 1997.
- P. Chesson. Multispecies competition in variable environments. *Theoretical Population Biology*, 45: 227–276, 1994.
- P.L. Chesson. Coexistence of competitors in a stochastic environment: the storage effect. In *Population Biology*, pages 188–198. Springer, 1983.
- P.L. Chesson. Interactions between environment and competition: How fluctuations mediate coexistence and competitive exclusion. In A. Hastings, editor, *Community Ecology*, pages 51–71, Berlin, Heidelberg, 1988. Springer Berlin Heidelberg.
- P.L. Chesson and R.R. Warner. Environmental variability promotes coexistence in lottery competitive systems. *The American Naturalist*, 117(6):923–943, 1981.
- C. Chu and P.B. Adler. Large niche differences emerge at the recruitment stage to stabilize grassland coexistence. *Ecological Monographs*, 85(3):373–392, 2015.
- E.E. Crone and D.R. Taylor. Complex dynamics in experimental populations of an annual plant, cardamine pensylvanica. *Ecology*, 77:289–299, 1996.

- K. Cuddington and A. Hastings. Autocorrelated environmental variation and the establishment of invasive species. *Oikos*, 125:1027–1034, 2016.
- K.M. Cuddington and P. Yodzis. Black noise and population persistence. *Proceedings of the Royal Society of London. Series B: Biological Sciences*, 266:969–973, 1999.
- S.P. Ellner, R.E. Snyder, and P.B. Adler. How to quantify the temporal storage effect using simulations instead of math. *Ecology Letters*, 19:1333–1342, 2016.
- S.P. Ellner, R.E. Snyder, P.B. Adler, and G. Hooker. An expanded modern coexistence theory for empirical applications. *Ecology Letters*, 22:3–18, 2018.
- P. Foley. Predicting extinction times from environmental stochasticity and carrying capacity. *Conservation Biology*, 8:124–137, 1994.
- T. Fukami. Historical contingency in community assembly: Integrating niches, species pools, and priority effects. *Annual Review of Ecology, Evolution, and Systematics*, 46:1–23, 2015.
- T. Fukami, E.A. Mordecai, and A. Ostling. A framework for priority effects. *Journal of Vegetation Science*, 27:655–657, 2016.
- O. Gilg, I. Hanski, and B. Sittler. Cyclic dynamics in a simple vertebrate predator-prey community. *Science*, 302(5646):866–868, 2003.
- O. Godoy, N. J. B. Kraft, and J. M. Levine. Phylogenetic relatedness and the determinants of competitive outcomes. *Ecology Letters*, 17:836–844, 2014.
- A. Gonzalez and R.D. Holt. The inflationary effects of environmental fluctuations in source-sink systems. *Proceedings of the National Academy of Sciences*, 99:14872–14877, 2002.
- J. Gurevitch, L.L. Morrow, A. Wallace, and J.S. Walsh. A meta-analysis of competition in field experiments. *The American Naturalist*, 140:539–572, 1992.
- G.E. Hutchinson. The paradox of the plankton. *The American Naturalist*, 95:137–145, 1961.
- L. Jiang and P.J. Morin. Temperature fluctuation facilitates coexistence of competing species in experimental microbial communities. *Journal of Animal Ecology*, 76:660–668, 2007.
- I. Kaplan and R.F. Denno. Interspecific interactions in phytophagous insects revisited: a quantitative assessment of competition theory. *Ecology Letters*, 10:977–994, 2007.
- S. Karlin and H.E. Taylor. *A second course in stochastic processes*. Elsevier, 1981.
- A.D. Letten, M.K. Dhami, P. Ke, and T. Fukami. Species coexistence through simultaneous fluctuation-dependent mechanisms. *Proceedings of the National Academy of Sciences*, 115:6745–6750, 2018.
- D.P. Matthews and A. Gonzalez. The inflationary effect of environmental fluctuations ensure the persistence of sink metapopulations. *Ecology*, 88:2848–2856, 2007.
- R.M. May. Simple mathematical models with very complicated dynamics. *Nature*, 261(5560):459–467, 1976.
- R. McGehee and R.A. Armstrong. Some mathematical problems concerning the ecological principle of competitive exclusion. *Journal of Differential Equations*, 23:30–52, 1977.
- C.J.E Metcalf and D.N Koons. Environmental uncertainty, autocorrelation and the evolution of survival. *Proceedings of the Royal Society B: Biological Sciences*, 274:2153–2160, 2007.
- O.L. Petchey, A. Gonzalez, and H.B. Wilson. Effects on population persistence: the interaction between environmental noise colour, intraspecific competition and space. *Proceedings of the Royal Society of London. Series B: Biological Sciences*, 264:1841–1847, 1997.
- N. Pike, T. Tully, P. Haccou, and R. Ferrière. The effect of autocorrelation in environmental variability on the persistence of populations: an experimental test. *Proceedings of the Royal Society of London. Series B: Biological Sciences*, 271:2143–2148, 2004.
- M.L. Puterman. *Markov Decision Processes.: Discrete Stochastic Dynamic Programming*. John Wiley & Sons, 2014.

- M. Roy, R.D. Holt, and M. Barfield. Temporal autocorrelation can enhance the persistence and abundance of metapopulations comprised of coupled sinks. *The American Naturalist*, 166:246–261, 2005.
- S.J. Schreiber. Persistence despite perturbations for interacting populations. *Journal of Theoretical Biology*, 242:844–852, 2006.
- S.J. Schreiber. Interactive effects of temporal correlations, spatial heterogeneity and dispersal on population persistence. *Proceedings of the Royal Society B: Biological Sciences*, 277:1907–1914, 2010.
- S.J. Schreiber and J.L. Moore. The structured demography of open populations in fluctuating environments. *Methods in Ecology and Evolution*, 9:1569–1580, 2018.
- S.J. Schreiber, M. Benaïm, and K.A.S. Atchadé. Persistence in fluctuating environments. *Journal of Mathematical Biology*, 62:655–683, 2011.
- S.J. Schreiber, M. Yamamichi, and S.Y. Strauss. When rarity has costs: coexistence under positive frequency-dependence and environmental stochasticity. *Ecology*, 100, 2019.
- MA Semenov. Simulation of extreme weather events by a stochastic weather generator. *Climate Research*, 35:203–212, 2008.
- H.L. Smith. Planar competitive and cooperative difference equations. *Journal of Difference Equations and Applications*, 3:335–357, 1998.
- J.H. Steele. A comparison of terrestrial and marine ecological systems. *Nature*, 313(6001):355–358, 1985.
- F. Sun, M.L. Roderick, and G.D. Farquhar. Rainfall statistics, stationarity, and climate change. *Proceedings of the National Academy of Sciences*, 115:2305–2310, 2018.
- D. Tilman and D. Wedin. Oscillations and chaos in the dynamics of a perennial grass. *Nature*, 353(6345):653, 1991.
- S. Tuljapurkar and C.V. Haridas. Temporal autocorrelation and stochastic population growth. *Ecology Letters*, 9:327–337, 2006.
- M. Turelli. Random environments and stochastic calculus. *Theoretical Population Biology*, 12:140 – 178, 1977.
- J. Usinowicz, S.J. Wright, and A.R. Ives. Coexistence in tropical forests through asynchronous variation in annual seed production. *Ecology*, 93(9):2073–2084, 2012.
- D. A. Vasseur and P. Yodzis. The color of environmental noise. *Ecology*, 85:1146–1152, 2004.
- V. Volterra. Variations and fluctuations of the numbers of individuals in animal species living together. *ICES Journal of Marine Science*, 3:3–51, 1928.
- D.S. Wilks and R.L. Wilby. The weather generation game: a review of stochastic weather models. *Progress in Physical Geography*, 23:329–357, 1999.

## APPENDIX

In this appendix, I provide the mathematical details of the analysis of the deterministic and stochastic versions of the model (1) from the main text. Define the new coordinate system  $x_i = a_i n_i$  in which (1) from the main text becomes

$$(A1) \quad \begin{aligned} x_i(t+1) &= x_i(t) f(x_1(t) + x_2(t), \bar{e}_i + \Delta e_i(t)) \\ \Delta e_i(t+1) &= \rho \Delta e_i(t) + \sqrt{1 - \rho^2} \xi_i(t+1) \end{aligned}$$

where  $\xi_i(1), \xi_i(2), \dots$  are a sequence of i.i.d. random variables with mean 0, variance  $\sigma_i^2$  and cross-correlation  $\tau$ . Throughout this analysis, I assume that  $f$  is a continuous, positive function,  $C \mapsto f(C, e)$  is a decreasing function for all  $e$ ,  $e \mapsto f(C, e)$  is an increasing function for all  $C$ , and  $C \mapsto C f(C, e)$  is an increasing, bounded function. The first two assumptions ensure that fitness depends continuously on competition and environment, decreases with competition, and increases with the environmental variable. The third assumption corresponds to compensating density dependence and populations remaining bounded. A classic example of such a fitness function is the Beverton-Holt function with survival i.e.  $f(C, e) = \lambda / (1 + C) + s$  where either the maximal fitness  $\lambda$  of survivorship  $s$  are functions of  $e$ . Finally, I assume that  $\xi_i(t)$  take values in a compact set and  $|\rho| < 1$ . Collectively, these assumptions imply that the dynamics of (A1) are dissipative i.e. there is a compact set in  $K \subset [0, \infty)^2 \times \mathbb{R}^2$  such that non-negative solutions of (A1) eventually enter and remain in  $K$  for sufficiently large  $t$ .

Below, I first analyze the deterministic dynamics of (A1) i.e. when  $\Delta e_i(t) = 0$  for all  $t$ . This analysis shows that there are three possible competitive outcomes: species 1 excludes species 2, species 2 excludes species 1, or neutral coexistence in which the dynamics converge to a line of equilibria. Next, I analyze the stochastic dynamics of (A1) in three steps. First, using results from Benaïm and Schreiber [2009], I provide a condition that ensures each species can persist in isolation. When this condition holds, each species' dynamics converges to a unique stationary distribution  $(\hat{x}_i, \hat{\Delta e}_i)$ . When this condition doesn't hold, the species asymptotically converges to extinction with probability one. For the remainder of the stochastic analysis, I assume that the condition for each species persisting holds. Under this assumption, I use results from Benaïm and Schreiber [2019] to characterize coexistence and exclusion using the realized per-capita growth rates  $r_j$ . Finally, I use a diffusion type of approximation to derive the approximations for the realized per-capita growth rates  $r_j$  presented in the main text.

**Deterministic Analysis.** The model assumptions imply that (A1) is a strictly monotone, planar map with respect to the competitive ordering [see, e.g., Smith, 1998]. Each species persists individually if  $f(0, \bar{e}_i) > 1$  for  $i = 1, 2$ . Assume this condition holds for each species. Then, there are three cases to consider. First, assume that  $\bar{e}_1 > \bar{e}_2$ . Define  $\lambda = \max_{(x_1, x_2) \in K} f(x_1 + x_2, \bar{e}_2) / f(x_1 + x_2, \bar{e}_1)$  which is strictly less than 1 as  $\bar{e}_1 > \bar{e}_2$ ,  $e \mapsto f(C, e)$  is a strictly increasing, continuous function, and  $K$  is compact. Given any solution  $(x_1(t), x_2(t))$  to (A1) with  $x_1(0) > 0$ , we get  $x_2(t)/x_1(t) \leq \lambda^t (x_2(0)/x_1(0))$ . As  $x_1(t)$  is uniformly bounded i.e.  $(x_1(t), x_2(t)) \in K$ ,  $x_2(t)$  converges to 0 as  $t \rightarrow \infty$ . Similarly, if  $\bar{e}_2 > \bar{e}_1$ , species 2 excludes species 1. Finally, consider the case that  $\bar{e}_1 = \bar{e}_2$ . Then  $x_1(t)/x_2(t) = x_1(0)/x_2(0)$  for all time whenever  $x_2(0) > 0$ . Namely, the relative frequency of either species doesn't change over time. Moreover, as  $y(t) = x_1(t) + x_2(t)$  satisfies  $y(t+1) = y(t) f(y(t), \bar{e}_1)$  which a strictly monotone map with a unique positive equilibrium  $y^* > 0$ ,  $x_1(t) + x_2(t)$  converges to the  $y^*$  as  $t \rightarrow \infty$ . Hence,  $x_i(t)$  converges to  $x_i(0) y^* / (x_1(0) + x_2(0))$  as  $t \rightarrow \infty$  for  $i = 1, 2$ . Thus, there is a globally stable line of equilibria given by  $\{(y^* p, y^* (1 - p)) : 0 \leq p \leq 1\}$ .

**General Stochastic Analysis.** Define  $g(x, e) = \log f(x, e)$  and assume  $|\rho| < 1$ . As the dynamics of  $\Delta e_i$  are given by a multivariate autoregressive process where the linear term is contracting (i.e.

$|\rho| < 1$ ) and  $\xi(t)$  are uniformly bounded,  $\Delta e_i(t)$  converge to a unique stationary distribution  $\widehat{\Delta e}_i$  [see, e.g., [Schreiber and Moore, 2018](#)]. For each species  $i$  in isolation of the other species, their realized per-capita growth rate at low densities is  $\mathbb{E}[g(0, \bar{e}_i + \widehat{\Delta e}_i)] > 0$ . When this realized per-capita growth rate is positive and  $x_i(0) > 0$ , Theorem 1 in [[Benaïm and Schreiber, 2009](#)] implies that solutions  $(x_i(t), \Delta e_1(t), \Delta e_2(t))$  for the species  $i$  subsystem with  $x_i(0) > 0$  converges to a unique stationary distribution  $(\widehat{x}_i, \widehat{\Delta e}_1, \widehat{\Delta e}_2)$ . In contrast, if  $\mathbb{E}[g(0, \bar{e}_i + \widehat{\Delta e}_i)] < 0$ , Proposition 1 in [[Benaïm and Schreiber, 2009](#)] implies that  $x_i(t)$  converges to 0 with probability one. From the rest of the stochastic analysis, assume that  $\mathbb{E}[g(0, \bar{e}_i + \widehat{\Delta e}_i)] > 0$  for both species  $i = 1, 2$ .

The realized per-capita growth rate of species  $j \neq i$  when species  $i$  is at its stationary distribution equals

$$r_j = \mathbb{E}[g(\widehat{x}_i, \bar{e}_j + \widehat{\Delta e}_j)].$$

Theorem 1 from [[Benaïm and Schreiber, 2019](#)] implies that the two species coexist (in the sense of stochastic persistence) whenever  $r_1 > 0$  and  $r_2 > 0$ . In contrast, if  $r_j < 0$ , then Theorem 3 from [[Benaïm and Schreiber, 2019](#)] implies that species  $j$  goes extinct with high probability whenever its initial density is sufficiently low. Under suitable accessibility assumptions (see [Benaïm and Schreiber \[2019\]](#) for definitions), stronger conclusions hold when  $r_j < 0$ . In particular, if  $r_1 > 0 > r_2$  (respectively,  $r_2 > 0 > r_1$ ), then species 1 excludes species 2 with probability one (respectively, species 2 excludes species 1) whenever  $x_1(0) > 0$  (respectively,  $x_2(0) > 0$ ). Alternatively, if  $r_1 < 0$  and  $r_2 < 0$ , then either species, with complementary positive probabilities, goes extinct whenever both are initially present i.e. a stochastic priority effect.

**Diffusion scaling to approximate  $r_j$ .** For any  $\varepsilon > 0$ , assume that (i)  $\xi_i(t) = \varepsilon \eta_i(t)$  where  $\eta_i(t)$  are i.i.d. with mean zero, variance  $v_i$ , and  $\mathbb{E}[\eta_1(t)\eta_2(t)] = \tau$ , and (ii)  $\bar{e}_i = \bar{e} + \varepsilon^2 a_i$ . To ensure each species persists in the absence of the other, assume that the low-density per-capita growth rate  $g(0, \bar{e})$  is positive. Then there exists  $x^* > 0$  be such that  $g(x^*, \bar{e}) = 0$ .  $x^*$  corresponds to the single species, equilibrium density in the absence of fitness differences and environmental fluctuations. Assume that  $g(x, e)$  is three times continuously differentiable and let  $g_x, g_e, g_{xe}$ , etc. denote the partial derivatives  $\frac{\partial g}{\partial x}(x^*, \bar{e})$ ,  $\frac{\partial g}{\partial e}(x^*, \bar{e})$ ,  $\frac{\partial^2 g}{\partial x \partial e}(x^*, \bar{e})$ , etc. evaluated at  $(x^*, \bar{e})$ .

Consider species  $i$  as the common or resident species and  $j \neq i$  as the rare or invading species. Proposition 1(iii) from [[Benaïm and Schreiber, 2019](#)] implies that the realized per-capita growth of  $i$ ,  $\mathbb{E}[g(\widehat{x}_i, \bar{e}_i + \widehat{\Delta e}_i)]$ , at its stationary distribution equals zero. Thus, taking a Taylor's expansion and defining  $\widehat{\Delta x}_i = \widehat{x}_i - x^*$  yields

$$\begin{aligned} 0 &= \mathbb{E}[g(\widehat{x}_i, \bar{e}_i + \widehat{\Delta e}_i)] \\ &= g(x^*, \bar{e}) + g_x \mathbb{E}[\widehat{\Delta x}_i] + g_e \mathbb{E}[\varepsilon^2 a_i + \widehat{\Delta e}_i] + \frac{g_{xx}}{2} \mathbb{E}[(\widehat{\Delta x}_i)^2] + \frac{g_{ee}}{2} \mathbb{E}[(\varepsilon^2 a_i + \widehat{\Delta e}_i)^2] \\ &\quad + g_{xe} \mathbb{E}[(\widehat{\Delta x}_i)(\varepsilon^2 a_i + \widehat{\Delta e}_i)] + O(\varepsilon^3) \\ &= g_x \mathbb{E}[\widehat{\Delta x}_i] + \varepsilon^2 \left( g_e a_i + \frac{g_{ee}}{2} v_i \right) + \frac{g_{xx}}{2} \mathbb{E}[(\widehat{\Delta x}_i)^2] + g_{xe} \mathbb{E}[\widehat{\Delta x}_i \widehat{\Delta e}_i] + O(\varepsilon^3) \end{aligned} \tag{A2}$$

as  $g(x^*, \bar{e}) = 0$  due to the definition of  $x^*$ ,  $\mathbb{E}[\widehat{\Delta e}_i] = 0$ , and  $\mathbb{E}[(\widehat{\Delta e}_i)^2] = v_i$ , and  $\mathbb{E}[\widehat{\Delta x}_i \varepsilon^2 a_i] = O(\varepsilon^3)$ .



Similarly, we get

$$\begin{aligned}
 r_j &= \mathbb{E}[g(\widehat{x}_i, \bar{e}_j + \widehat{\Delta}e_j)] \\
 &= g(x^*, \bar{e}) + g_x \mathbb{E}[\widehat{\Delta}x_i] + g_e \mathbb{E}[\varepsilon^2 a_j + \widehat{\Delta}e_j] + \frac{g_{xx}}{2} \mathbb{E}[(\widehat{\Delta}x_i)^2] + \frac{g_{ee}}{2} \mathbb{E}[(\varepsilon^2 a_j + \widehat{\Delta}e_j)^2] \\
 &\quad + g_{xe} \mathbb{E}[(\widehat{\Delta}x_i)(\varepsilon^2 a_j + \widehat{\Delta}e_j)] + O(\varepsilon^3) \\
 &= g_x \mathbb{E}[\widehat{\Delta}x_i] + \varepsilon^2 \left( g_e a_j + \frac{g_{ee}}{2} v_j \right) + \frac{g_{xx}}{2} \mathbb{E}[(\widehat{\Delta}x_i)^2] + g_{xe} \mathbb{E}[\widehat{\Delta}x_i \widehat{\Delta}e_j] + O(\varepsilon^3).
 \end{aligned}
 \tag{A3}$$

Subtracting equation (A2) from equation (A3) yields

$$r_j = \varepsilon^2 \left( g_e(a_j - a_i) + \frac{g_{ee}}{2}(v_j - v_i) \right) + g_{xe} \mathbb{E}[\widehat{\Delta}x_i(\widehat{\Delta}e_j - \widehat{\Delta}e_i)] + O(\varepsilon^3).
 \tag{A4}$$

To get an explicit expression for  $\mathbb{E}[\widehat{\Delta}x_i(\widehat{\Delta}e_j - \widehat{\Delta}e_i)]$ , one can approximate the dynamics of  $x_i$  as a first order autoregressive process by linearizing (A1) at  $(x_i, e_1, e_2) = (x^*, \bar{e}, \bar{e})$ . To this end, define  $F(x, e) = xf(x, e)$  and  $F_x, F_e$  as the partial derivatives  $\frac{\partial F}{\partial x}(x^*, \bar{e})$ ,  $\frac{\partial F}{\partial e}(x^*, \bar{e})$ . Then, the first-order autoregressive approximation of (A1) is

$$\begin{aligned}
 \Delta x_i(t+1) &= F_x \Delta x_i(t) + F_e(\varepsilon^2 a_i + \Delta e_i) \\
 \Delta e_i(t+1) &= \rho \Delta e_i(t) + \sqrt{1 - \rho^2} \xi_i(t) \\
 \Delta e_j(t+1) &= \rho \Delta e_j(t) + \sqrt{1 - \rho^2} \xi_j(t).
 \end{aligned}
 \tag{A5}$$

Equivalently, defining  $z = (\Delta x_i, \Delta e_i, \Delta e_j)$

$$z(t+1) = \underbrace{\begin{pmatrix} F_x & F_e & 0 \\ 0 & \rho & 0 \\ 0 & 0 & \rho \end{pmatrix}}_{=:A} z(t) + \underbrace{\begin{pmatrix} F_e \varepsilon^2 a_i \\ \sqrt{1 - \rho^2} \xi_i(t) \\ \sqrt{1 - \rho^2} \xi_j(t) \end{pmatrix}}_{=:b(t)}$$

The covariance matrix of  $z(t)$ ,  $\text{Cov}[\widehat{z}]$ , at stationarity [see, e.g., Schreiber and Moore, 2018] satisfies

$$\text{vec}(\text{Cov}[\widehat{z}]) = (\text{Id} - A \otimes A)^{-1} \text{vec}(\text{Cov}[b(t)])$$

where  $\text{vec}(\cdot)$  is a column vector given by concatenating the columns of its argument  $\cdot$  and  $\otimes$  denotes the Kroenker product. Carrying out this calculation yields the approximations

$$\mathbb{E}[\widehat{\Delta}x_i \widehat{\Delta}e_i] = \frac{F_e \rho \sigma_1^2}{F_x \rho^3 - \rho^2 - F_x \rho + 1} \text{ and } \mathbb{E}[\widehat{\Delta}x_i \widehat{\Delta}e_j] = \frac{F_e \rho \tau \sigma_1 \sigma_2}{F_x \rho^3 - \rho^2 - F_x \rho + 1}.$$

To see that the denominator of these expressions is positive for  $|\rho| < 1$ , define  $h(y) = y\rho(\rho^2 - 1) - \rho^2 + 1$ . As  $F_x \in (0, 1)$  (i.e. the equilibrium is stable as the dynamics are compensatory), one needs to only consider  $h(y)$  for  $y \in (0, 1)$ . The minimum of  $h(y)$  occurs either at  $y = 1$  or  $y = -1$  or at  $0 < y < 1$  where  $h'(y) = 0$ . For  $|\rho| < 1$ ,  $h'(y) = \rho(\rho^2 - 1) = 0$  only when  $\rho = 0$  in which case  $h(y) = 1 > 0$ . As  $h(0) = 1 - \rho^2 > 0$  for  $|\rho| < 1$  and  $h(1) = \rho^3 - \rho^2 - \rho + 1 > 0$  for  $|\rho| < 1$ , it follows that  $h(y) > 0$  for  $y \in (0, 1)$  whenever  $|\rho| < 1$ .

Define

$$C = \frac{F_e}{F_x \rho^3 - \rho^2 - F_x \rho + 1} > 0.$$

Then,

$$r_j = g_e(\bar{e}_j - \bar{e}_i) + \frac{g_{ee}}{2}(\sigma_j^2 - \sigma_i^2) + C g_{xe} \rho(\tau \sigma_j - \sigma_i) \sigma_i + O(\varepsilon^3)
 \tag{A6}$$

as claimed in the main text.
